# Supplementary material for: Aberrant AHRR, ADAMTS2 and FAM184 DNA Methylation: Candidate Biomarkers in the Oral Rinse of Heavy Smokers
Source: MDPI journal article supplement (doi:10.3390/biomedicines11071797), 2023-06-23
Supplement: s1 [file s1]

## SUPPLEMENTARY TABLES

**Table S1.** Genomic differentially methylated probes found in genome-wide analysis with the final statistical model for heavy smokers in the cancer-free subset.

| Probe ID          | Gene Symbol    | logFC | AveExpr | T    | P.Value  | Adj.P.Val | B    | $\Delta\beta$ | Dir |
|-------------------|----------------|-------|---------|------|----------|-----------|------|---------------|-----|
| <b>cg02599361</b> | <i>ADAMTS2</i> | 0.136 | 0.664   | 5.70 | 3.13E-07 | 0.012     | 5.37 | 0.10          | ↑   |
| <b>cg04450456</b> | <i>FAM184B</i> | 0.097 | 0.811   | 4.78 | 1.06E-05 | 0.038     | 1.88 | 0.10          | ↑   |

Note: The final statistical model included sex, age, and alcohol consumption level, in addition to the comparison between heavy smokers and nonsmokers to find genomic regions with different DNA methylation patterns. Abbreviations: Probe ID: code of Illumina 450K probe. Adj.P.Val: adjusted p value for multiple tests with Benjamini & Hochberg. Gene Symbol: Unique symbol of the NCBI Gene database. B: logarithm of the probability of difference between groups. LogFC: maximum value of relative change (fold change) between smoking and nonsmoking groups.  $\Delta\beta$ : Absolute difference between  $\beta$  methylation between heavy smokers and nonsmokers. Dir: direction of DNA methylation difference where ↑ corresponds to differentially hypermethylated positions in heavy smokers.

**Table S2.** Genomic differentially methylated probes in the final statistical model for smoking habit, inside the cancer-diagnosed subset.

| Probe ID          | Gene Symbol | logFC | AveExpr | T     | P.Value  | Adj.P.Val | B     | $\Delta\beta$ | Dir |
|-------------------|-------------|-------|---------|-------|----------|-----------|-------|---------------|-----|
| <b>cg05951221</b> | Intergenic  | -0.11 | 0.40    | -7.16 | 4.32E-11 | 9.05E-06  | 13.63 | -0.10         | ↓   |
| <b>cg21566642</b> | Intergenic  | -0.11 | 0.40    | -6.44 | 1.81E-09 | 2.53E-04  | 9.95  | -0.10         | ↓   |

Note: The final statistical model included sex, age, and alcohol consumption level, in addition to the comparison between heavy smokers and nonsmokers to find genomic regions with different DNA methylation patterns. Abbreviations: Probe ID: code of Illumina 450K probe. Adj.P.Val: adjusted p value for multiple tests with Benjamini & Hochberg. Gene Symbol: Unique symbol of the NCBI Gene database. B: logarithm of the probability of difference between groups. LogFC: maximum value of relative change (fold change) between smoking and nonsmoking groups.  $\Delta\beta$ : Absolute difference between  $\beta$  methylation between heavy smokers and nonsmokers. Dir: direction of DNA methylation difference where ↓ corresponds to differentially hypomethylated positions in heavy smokers.

**Table S3.** Differentially methylated regions in the initial statistical model for heavy smokers, in the cancer-free subset.

| hg19 coordinates         | width | Gene(s)              | Group                           | #p | Minpval  | meanpval | maxbetafc | mean Dbet | Dir |
|--------------------------|-------|----------------------|---------------------------------|----|----------|----------|-----------|-----------|-----|
| chr12:2943902-2944493    | 592   | NRIP2                | 1stExon, 5'UTR, TSS200, TSS1500 | 8  | 8.65E-11 | 1.81E-10 | 0.016     | 0.07      | ↑   |
| chr4:17643702-17643749   | 48    | FAM184B              | Body                            | 2  | 1.75E-8  | 1.76E-8  | 0.016     | 0.10      | ↑   |
| chr1:102312608-102312671 | 64    | OLFM3                | Body                            | 3  | 1.10E-4  | 1.11E-4  | 0.015     | 0.08      | ↑   |
| chr20:44838776-44839734  | 959   | CDH22                | Body                            | 4  | 2.32E-4  | 8.38E-3  | 0.014     | 0.06      | ↑   |
| chr14:34268920-34270437  | 1518  | NPAS3                | Body,3'UTR                      | 7  | 3.13E-4  | 6.95E-3  | 0.016     | 0.06      | ↑   |
| chr19:49000743-49002477  | 1735  | LMTK3                | Body                            | 6  | 4.01E-4  | 2.03E-2  | 0.013     | 0.07      | ↑   |
| chr19:18888081-18889003  | 923   | CRTC1                | Body,3'UTR                      | 3  | 4.60E-4  | 4.39E-3  | 0.013     | 0.07      | ↑   |
| chr7:52341469-52342124   | 656   |                      |                                 | 4  | 5.55E-4  | 7.99E-4  | 0.012     | 0.06      | ↑   |
| chr7:27231491-27232150   | 660   |                      |                                 | 4  | 4.91E-3  | 1.02E-2  | -0.015    | -0.06     | ↓   |
| chr3:22412124-22412746   | 623   |                      |                                 | 3  | 5.07E-3  | 6.71E-3  | 0.021     | 0.11      | ↑   |
| chr10:1405937-1406508    | 572   | ADARB2               | Body                            | 2  | 5.41E-3  | 9.65E-3  | 0.015     | 0.07      | ↑   |
| chr1:19110734-19110978   | 245   |                      |                                 | 3  | 5.72E-3  | 5.80E-3  | 0.031     | 0.13      | ↑   |
| chr17:80708279-80708513  | 235   | FN3K, TBCD           | Body, TSS1500                   | 3  | 6.27E-3  | 6.73E-3  | 0.018     | 0.09      | ↑   |
| chr4:100242862-100242957 | 96    | ADH1B                | TSS1500                         | 2  | 6.78E-3  | 7.41E-3  | 0.014     | 0.07      | ↑   |
| chr8:144809598-144810339 | 742   | FAM83H               | Body                            | 4  | 1.36E-2  | 2.17E-2  | 0.010     | 0.06      | ↑   |
| chr8:105379726-105379985 | 260   |                      |                                 | 2  | 2.24E-2  | 3.41E-2  | 0.012     | 0.06      | ↑   |
| chr1:211652276-211652688 | 413   | RD3                  | 3'UTR,Body                      | 3  | 3.00E-2  | 3.13E-2  | 0.020     | 0.08      | ↑   |
| chr8:145755756-145755974 | 219   | MGC70857<br>KIAA1688 | TSS1500, 3'UTR,Body             | 3  | 3.49E-2  | 4.30E-2  | 0.012     | 0.07      | ↑   |

Note: The initial statistical model included sex and gender variables in addition to the comparison between heavy smokers and nonsmokers to find genomic regions with different DNA methylation patterns. Abbreviations. *hg19 coordinates*: coordinates of localization in the human genome hg19, starting with the chromosome number, followed by the coordinates where differential DNA methylation was found. Width: the width of the genomic region in bp. Gene(s): the corresponding gene(s) associated with the region according to DMRcate's function. Group: Illumina intergenic position original annotation. #p: Number of probes/CpGs that support the corresponding genomic ranges. minpval: minimum of the p value corresponding to neighboring probes/CpGs. meanpval: mean of the p value corresponding to neighboring probes/CpGs. maxbetafc: the major fold change M value corresponding to the probes inside the corresponding genomic range. mean Dbeta: the net difference between beta values between groups (HS-control). Dir: direction of DNA methylation difference where ↑ corresponds to differentially hypermethylated positions in heavy smokers, and ↓ corresponds to differentially hypomethylated positions in heavy smokers.

**Table S4.** Differentially methylated regions in heavy smokers, genome-wide analysis for the cancer-free subset

| hg19 coordinates          | width | Gene(s) | Group | #p | minpval  | meanpval | maxbetafc | mean Dbet | Dir |
|---------------------------|-------|---------|-------|----|----------|----------|-----------|-----------|-----|
| chr5:373299-373887        | 589   | AHRR    | Body  | 3  | 4.60E-07 | 5.54E-04 | -0.02     | -0.07     | ↓   |
| chr14:106092151-106092151 | 1     |         |       | 1  | 2.55E-02 | 2.55E-02 | -0.01     | -0.08     | ↓   |

Note: The initial statistical model included sex and gender variables in addition to the comparison between heavy smokers and nonsmokers to find genomic regions with different DNA methylation patterns. Abbreviations. *hg19 coordinates*: coordinates of localization in the human genome hg19, starting with the chromosome number, followed by the coordinates where differential DNA methylation was found. Width: the width of the genomic region in bp. Gene(s): the corresponding gene(s) associated with the region according to DMRcate's function. Group: Illumina intergenic position original annotation. #p: Number of probes/CpGs that support the corresponding genomic ranges. minpval: minimum of the p value corresponding to neighboring probes/CpGs. meanpval: mean of the p value corresponding to neighboring probes/CpGs. maxbetafc: the major fold change M value corresponding to the probes inside the corresponding genomic range. mean Dbeta: the net difference between beta values between groups (HS-control). Dir: direction of DNA methylation difference where ↑ corresponds to differentially hypermethylated regions in heavy smokers, and ↓ corresponds to differentially hypomethylated regions in heavy smokers.

**Table S5.** Differentially methylated probes focused on genes prioritized using the final statistical model; inside the cancer-free subset.

| Probe ID   | Gene Symbol | logFC | AveExpr | t     | P.Value  | B     | $\Delta\beta$ | Dir |
|------------|-------------|-------|---------|-------|----------|-------|---------------|-----|
| cg00326464 | TFAP2A      | -0.06 | 0.17    | -2.76 | 7.55E-03 | -4.41 | -0.06         | ↓   |
| cg02599361 | ADAMTS2     | 0.13  | 0.66    | 4.93  | 5.80E-06 | 2.45  | 0.10          | ↑   |
| cg04450456 | FAM184B     | 0.10  | 0.81    | 5.75  | 2.42E-07 | 5.56  | 0.10          | ↑   |
| cg05575921 | AHRR        | -0.11 | 0.72    | -3.35 | 1.33E-03 | -2.79 | -0.12         | ↓   |
| cg10208897 | ADAMTS2     | 0.09  | 0.77    | 4.63  | 1.75E-05 | 1.38  | 0.07          | ↑   |
| cg15017067 | FAM184B     | 0.09  | 0.77    | 4.65  | 1.62E-05 | 1.44  | 0.09          | ↑   |
| cg20559215 | MAPK14      | 0.02  | 0.87    | 3.21  | 2.05E-03 | -3.13 | 0.07          | ↑   |

<sup>a</sup> Note: the initial statistical model included sex and gender variables, in addition to the contrast between heavy smokers and non-smokers to find differentially methylated positions, in the prioritized genes. Abbreviations: Probe ID: code of Illumina 450K probe. Adj.P.Val: adjusted p value with for multiple tests of Benjamini & Hochberg. Gene Symbol: Unique symbol of the NCBI Gene database. B: logarithm of a probability of difference between groups. LogFC: maximum value of relative change (fold change) between smoking and non-smoking groups.  $\Delta\beta$ : Absolute difference between  $\beta$  methylation between heavy smokers and non-smokers. Dir: direction of DNA methylation difference where ↑ corresponds to differentially hypermethylated positions in heavy smokers, and ↓ corresponds to differentially hypomethylated positions in heavy smokers.

**Table S6.** Differentially methylated probes focused on genes prioritized using the final statistical model; results in the cancer-diagnosed subset.

| Probe ID   | Gene Symbol | logFC | AveExpr | t     | P.Value | B     | $\Delta\beta$ | B.nf | B.f  | Dir |
|------------|-------------|-------|---------|-------|---------|-------|---------------|------|------|-----|
| cg05575921 | AHRR        | -0.11 | 0.72    | -4.68 | 6.76E-6 | 1.92  | -0.13         | 0.67 | 0.80 | ↓   |
| cg23576855 | AHRR        | -0.08 | 0.60    | -2.99 | 3.34E-3 | -3.94 | -0.09         | 0.57 | 0.66 | ↓   |

Note I: only statistically significant results are shown (p value <0.005). Note II: the final statistical model included sex and gender variables, alcohol consumption level in addition to the contrast between heavy smokers and non-smoker. Abbreviations: Probe ID: code of Illumina 450K probe. Adj.P.Val: adjusted p value with for multiple tests of Benjamini & Hochberg. Gene Symbol: Unique symbol of the NCBI Gene database. B: logarithm of a probability of difference between groups. LogFC: maximum value of relative change (fold change) between smoking and non-smoking groups.  $\Delta\beta$ : Absolute difference between  $\beta$  methylation between heavy smokers and non-smokers. Dir: direction of DNA methylation difference where ↓ corresponds to differentially hypomethylated positions in heavy smokers.
